# Supplementary material
Source: ML conference proceedings conference paper supplement (https://proceedings.neurips.cc/paper_files/paper/2020/hash/77133be2e96a577bd4794928976d2ae2-Abstract.html)
Supplement: Supplementary file [file 77133be2e96a577bd4794928976d2ae2-Supplemental.pdf]

## A Appendix: Lemmas

**Lemma 1** (Total-variance divergence of joint distributions). *Given two joint distributions  $p(x, y) = p(y|x)p(x)$  and  $\tilde{p}(x, y) = \tilde{p}(y|x)\tilde{p}(x)$ , the total-variance divergence can be bounded by*

$$D_{TV}[p(x, y), \tilde{p}(x, y)] \leq D_{TV}[p(x), \tilde{p}(x)] + \mathbb{E}_{x \sim \tilde{p}}[D_{TV}[p(y|x), \tilde{p}(y|x)]] \quad (10)$$

*Proof.*

$$\begin{aligned} D_{TV}[p(x, y), \tilde{p}(x, y)] &= \frac{1}{2} \sum_{x, y} |p(x, y) - \tilde{p}(x, y)| \\ &= \frac{1}{2} \sum_{x, y} |p(y|x)p(x) - \tilde{p}(y|x)\tilde{p}(x)| \\ &= \frac{1}{2} \sum_{x, y} |p(y|x)p(x) - p(y|x)\tilde{p}(x) + p(y|x)\tilde{p}(x) - \tilde{p}(y|x)\tilde{p}(x)| \\ &\leq \frac{1}{2} \sum_{x, y} p(y|x)|p(x) - \tilde{p}(x)| + \frac{1}{2} \sum_{x, y} \tilde{p}(x)|p(y|x) - \tilde{p}(y|x)| \\ &= \frac{1}{2} \sum_x |p(x) - \tilde{p}(x)| + \frac{1}{2} \sum_x \tilde{p}(x) \sum_y |p(y|x) - \tilde{p}(y|x)| \\ &= D_{TV}[p(x), \tilde{p}(x)] + \mathbb{E}_{x \sim \tilde{p}}[D_{TV}[p(y|x), \tilde{p}(y|x)]] \end{aligned}$$

□

**Lemma 2** (Total-variance divergence of two Markov chains). *Given two Markov chain  $p_{t+1}(x') = \sum_x p(x'|x)p_t(x)$  and  $\tilde{p}_{t+1}(x') = \sum_x \tilde{p}(x'|x)\tilde{p}_t(x)$ , we have*

$$D_{TV}[p_{t+1}(x'), \tilde{p}_{t+1}(x')] \leq D_{TV}[p_t(x), \tilde{p}_t(x)] + \mathbb{E}_{x \sim \tilde{p}_t}[D_{TV}[p(x'|x), \tilde{p}(x'|x)]] \quad (11)$$

Given policy  $\pi$  and transition  $p$ , we denote the density of state-action after  $t$  steps of transitions from  $s$  as  $p_t^\pi(s_t, a_t|s)$ . Specifically,  $p_0^\pi(s, a|s) = \pi(a|s)$ . For simplicity, when starting from  $p_0(s_0)$ , we let  $p_t^\pi(s_t, a_t) = \mathbb{E}_{s_0 \sim p_0}[p_t^\pi(s_t, a_t|s_0)]$ .

**Lemma 3** (Return gap). *Consider running two policies of  $\pi$  and  $\tilde{\pi}$  in two dynamics  $p$  and  $\tilde{p}$ , respectively. Let  $D_{TV}^{\max}(\pi, \tilde{\pi}) \triangleq \max_s D_{TV}[\pi_b(\cdot|s), \tilde{\pi}(\cdot|s)]$ ,  $\delta^{(0)}(\tilde{p}, p) \triangleq D_{TV}[p_0(s), \tilde{p}_0(s)]$ ,  $\delta_{\tilde{p}, \tilde{\pi}}^{(t)}(\tilde{p}, p) \triangleq \mathbb{E}_{s, a \sim \tilde{p}_{t-1}^{\tilde{\pi}}}[D_{TV}[p(s'|s, a), \tilde{p}(s'|s, a)]]$  for  $t \geq 1$ . Then the discounted returns up to step  $T$  are bounded as*

$$|J_T(\pi) - \tilde{J}_T(\tilde{\pi})| \leq 2r_{\max} \left( \frac{1}{(1-\gamma)^2} D_{TV}^{\max}(\pi, \tilde{\pi}) + \frac{1}{1-\gamma} \sum_{t=0}^T \gamma^t \delta_{\tilde{p}, \tilde{\pi}}^{(t)}(\tilde{p}, p) \right). \quad (12)$$

*Proof.* The expected rewards at step  $t$  is bounded by

$$|\mathbb{E}_{p_t^\pi}[r(s, a)] - \mathbb{E}_{\tilde{p}_t^{\tilde{\pi}}}[r(s, a)]| = \left| \sum_{s, a} r(s, a)(p_t^\pi(s, a) - \tilde{p}_t^{\tilde{\pi}}(s, a)) \right| \quad (13)$$

$$\leq \sum_{s, a} r_{\max} |p_t^\pi(s, a) - \tilde{p}_t^{\tilde{\pi}}(s, a)| \quad (14)$$

$$= 2r_{\max} D_{TV}[p_t^\pi(s, a), \tilde{p}_t^{\tilde{\pi}}(s, a)] \quad (15)$$

So

$$|J_T(\pi) - \tilde{J}_T(\tilde{\pi})| \leq \sum_{t=0}^T \gamma^t |\mathbb{E}_{p_t^\pi}[r(s, a)] - \mathbb{E}_{\tilde{p}_t^{\tilde{\pi}}}[r(s, a)]| \quad (16)$$

$$\leq 2r_{\max} \sum_{t=0}^T \gamma^t D_{TV}[p_t^\pi(s, a), \tilde{p}_t^{\tilde{\pi}}(s, a)] \quad (17)$$

By Lemma 1 and Lemma 2, we have

$$D_{\text{TV}}[p_t^\pi(s, a), \tilde{p}_t^\pi(s, a)] \leq D_{\text{TV}}[p_{t-1}^\pi(s, a), \tilde{p}_{t-1}^\pi(s, a)] + \delta_{\tilde{p}, \pi}^{(t)}(\tilde{p}, p) + D_{\text{TV}}^{\max}(\pi, \tilde{\pi}). \quad (18)$$

$$|J_T(\pi) - \tilde{J}_T(\tilde{\pi})| \quad (19)$$

$$\leq 2r_{\max} \sum_{t=0}^T \gamma^t \left( (t+1) D_{\text{TV}}^{\max}(\pi, \tilde{\pi}) + \sum_{\tau=0}^t \delta_{\tilde{p}, \tilde{\pi}}^{(\tau)}(\tilde{p}, p) \right) \quad (20)$$

$$= 2r_{\max} \sum_{t=0}^T (t+1) \gamma^t D_{\text{TV}}^{\max}(\pi, \tilde{\pi}) + 2r_{\max} \sum_{t=0}^T \left( \sum_{\tau=t}^T \gamma^\tau \right) \delta_{\tilde{p}, \tilde{\pi}}^{(t)}(\tilde{p}, p) \quad (21)$$

$$= 2r_{\max} \left[ \left( \frac{1 - \gamma^{T+1}}{(1 - \gamma)^2} - \frac{(T+1)\gamma^{T+1}}{1 - \gamma} \right) D_{\text{TV}}^{\max}(\pi, \tilde{\pi}) + \sum_{t=0}^T \frac{\gamma^t (1 - \gamma^{T-t+1})}{1 - \gamma} \delta_{\tilde{p}, \tilde{\pi}}^{(t)}(\tilde{p}, p) \right] \quad (22)$$

$$\leq \frac{2r_{\max}}{(1 - \gamma)^2} D_{\text{TV}}^{\max}(\pi, \tilde{\pi}) + \frac{2r_{\max}}{1 - \gamma} \sum_{t=0}^T \gamma^t \delta_{\tilde{p}, \tilde{\pi}}^{(t)}(\tilde{p}, p) \quad (23)$$

□

## B Appendix: Proofs of Theorems

**Theorem 3** (General return bound for model-based policy iteration).  $J(\pi)$  is lower-bounded by

$$J(\pi) \geq \tilde{J}(\pi) - \frac{2r_{\max}}{1 - \gamma} \sum_{t=0}^{+\infty} \gamma^t \delta_{\tilde{p}, \pi}^{(t)}(\tilde{p}, p).$$

*Proof.* According to Lemma 3, we have

$$J_T(\pi) \geq \tilde{J}_T(\tilde{\pi}) - \frac{2r_{\max}}{(1 - \gamma)^2} D_{\text{TV}}^{\max}(\pi, \tilde{\pi}) - \frac{2r_{\max}}{1 - \gamma} \sum_{t=0}^{+\infty} \gamma^t \delta_{\tilde{p}, \tilde{\pi}}^{(t)}(\tilde{p}, p). \quad (24)$$

Since  $D_{\text{TV}}^{\max}(\pi, \pi) = 0$ , we have the desired result. □

**Theorem 4.** Given a policy  $\pi$  and a state-action pair  $(s, a)$ , the discrepancy between the long-term return in the real environment and the return in the masked model rollout of  $(\tilde{p}, M)$  is bounded by

$$|Q^\pi(s, a) - \tilde{Q}_{\text{mask}}^\pi(s, a)| \leq \epsilon \sum_{t=0}^{+\infty} \gamma^t w(t; s, a),$$

*Proof.* By the definition of masked model rollout, we can write the transition as

$$p_{\text{mask}}(s_{t+1}|s_t, a_t) = \mathbb{I}\{t < H\} \tilde{p}(s_{t+1}|s_t, a_t) + \mathbb{I}\{t \geq H\} p(s_{t+1}|s_t, a_t).$$

So we can bound the single-step model error by

$$\mathbb{E}_\tau [D_{\text{TV}}[p(s_{t+1}|s_t, a_t), p_{\text{mask}}(s_{t+1}|s_t, a_t)] \mid \tilde{p}, \pi, M, s_0 = s, a_0 = a] \quad (25)$$

$$= \mathbb{E}_\tau [\mathbb{I}\{t < H\} D_{\text{TV}}[p(s_{t+1}|s_t, a_t), \tilde{p}(s_{t+1}|s_t, a_t)] \mid \tilde{p}, \pi, M, s_0 = s, a_0 = a] \quad (26)$$

$$\leq \epsilon w(t; s, a) \quad (27)$$

So by Lemma 3, we have the desired result. □

## C Appendix: Hyper-parameters

- Environment steps per epoch: 1000.
- Policy updates per epoch: 10000.
- Model rollouts per policy update: 10.
- Model rollout horizon  $H_{\max}$ : 1, 4, 7, 10.
- Masking rate  $w$ : 0.5 if  $H_{\max} = 1$ , else  $w_h = \frac{H_{\max} - h}{2(H_{\max} + 1)}$ .
- Model error penalty  $\alpha$ : 0.001.
